## Title

*Achromobacter* genetic adaptation in cystic fibrosis

## Running title

*Achromobacter* genetic adaptation

## Authors and affiliations

Migle Gabrielaite<sup>1,\*</sup> ([migle.gabrielaite@regionh.dk](mailto:migle.gabrielaite@regionh.dk)), Finn C. Nielsen<sup>1</sup> ([finn.cilius.nielsen@regionh.dk](mailto:finn.cilius.nielsen@regionh.dk)), Helle K. Johansen<sup>2,3</sup> ([hkj@biosustain.dtu.dk](mailto:hkj@biosustain.dtu.dk)), Rasmus L. Marvig<sup>1</sup> ([rasmus.lykke.marvig@regionh.dk](mailto:rasmus.lykke.marvig@regionh.dk))

<sup>1</sup> Center for Genomic Medicine, Rigshospitalet, Copenhagen, Denmark

<sup>2</sup> Department of Clinical Microbiology, Rigshospitalet, Copenhagen, Denmark

<sup>3</sup> Department of Clinical Medicine, Faculty of Health and Medical Sciences, University of Copenhagen, Copenhagen, Denmark

\* Correspondence to Migle Gabrielaite, [migle.gabrielaite@regionh.dk](mailto:migle.gabrielaite@regionh.dk)

## Abstract

*Achromobacter* is an emerging pathogen in patients with cystic fibrosis (CF) and *Achromobacter* caused infections are associated with more severe disease outcomes and high intrinsic antibiotic resistance. While conventional CF pathogens are studied extensively, little is known about the genetic determinants leading to antibiotic resistance and the genetic adaptation in *Achromobacter* infections.

Here, we analyzed 101 *Achromobacter* genomes from 51 patients with CF isolated during the course of up to 20 years of infection to identify within-host adaptation, mutational signatures, and genetic variation associated with increased antibiotic resistance.

We found that the same regulatory and inorganic ion transport genes were frequently mutated in persisting clone types within and between *Achromobacter* species indicating convergent genetic adaptation. Genome-wide association study (GWAS) of six antibiotic resistance phenotypes revealed the enrichment of associated genes involved in inorganic ion transport genes, transcription gene enrichment in  $\beta$ -lactams, and energy production and translation gene enrichment in the trimethoprim/sulfonamide group.

Overall, we provide insights into the pathogenomics of *Achromobacter* infections in patients with CF airways. Since emerging pathogens are increasingly recognised as an important healthcare issue, our findings on evolution of antibiotic resistance and genetic adaptation can facilitate better understanding of disease progression and how mutational changes have implications for patients with CF.

**Keywords:** within-host evolution; host-pathogen interaction; microbial genomics; genomic adaptation; *Achromobacter*; cystic fibrosis airway infection; GWAS

## Introduction

*Achromobacter* species is an emerging pathogen causing chronic bacterial infections in patients with CF and is a major cause of morbidity and mortality in these patients. (1,2) Analysis of pathogen genomes, i.e. pathogenomics, have shown that within-host pathogen genetic adaptation plays a role in these infections. (3,4) While conventional CF pathogens, e.g. *Pseudomonas aeruginosa* and *Staphylococcus aureus*, are studied extensively, little is known about the extent within- and between-patient genetic adaptation has in *Achromobacter* infections, particularly *A. ruhlandii*, *A. insuavis* and *A. xylosoxidans* as they mainly cause chronic, long-term infections in patients with CF. (5–7) Furthermore, genetic features could be used for successful resistance profile predictions as conventional methods are both time consuming and occasionally do not reflect the *in vivo* susceptibility profiles. (8–10) Knowledge of within-host *Achromobacter* adaptation and genetic factors leading to antibiotic resistance development are key for urgently needed new treatment strategy development and pathogen elimination.

Here, we analyzed 101 previously whole genome sequenced (WGS) *Achromobacter* isolates from 51 patients to investigate the genetic relatedness and within-host genetic changes of *Achromobacter* over the course of up to 20 years of infections. First, we aimed to identify the main gene content differences between- and within-*Achromobacter* isolates. Second, we aimed to identify pace and patterns in genetic changes, and compare it to the other pathogenic bacteria in CF. Finally, we attempted to define the most significant associations between *Achromobacter* genetic features and antibiotic resistance phenotypes. Ultimately, this work on the main *Achromobacter* genomic changes acquired during infections in patients with CF, leads to the possibility of genomic-based disease progression prediction, and improved strategies to track and treat persistent airway infections.

## Materials and Methods

### Bacterial isolates

Our analysis included 101 clinical isolates of *Achromobacter* that were defined in detail previously by Gabrielaite *et al.*, (2020). (11) The isolates were sampled from 51 patients with CF attending the Copenhagen Cystic Fibrosis Center at Rigshospitalet, Copenhagen, Denmark. Over the timespan of 0–20 years (median 6.5 years), 64 isolates from 25 patients were longitudinally collected (median 2 isolates) and 37 isolates from 29 patients were single isolates. 29, 18 and 52 isolates belonged to *A. ruhlandii*, *A. insuavis* and *A. xylosoxidans*, respectively. Furthermore, single isolates belonging to *A. aegrifaciens* and a new genogroup were sequenced.

### Bacterial genome sequencing and definition of clone type

Genomic DNA was prepared from *Achromobacter* isolates using a DNeasy Blood and Tissue kit (Qiagen) and sequenced on an Illumina MiSeq platform, generating 250 base paired-end reads. On average, 1,124,551 reads (range of 350,677–2,118,817) for each of the genomic libraries were obtained. Clone types were defined by Pactyper (12) using the default parameters and species' core genome defined by GenAPI. (13) Lineage was defined as all isolates belonging to the same species and the same clone type.

### Bacterial genome assembly

Sequence reads from each isolate were corrected and assembled by SPAdes 3.10.1 (14) using default parameters and k-mer sizes ranging from 21 to 127. Assembled contigs were joined to 216 scaffolds on average (92–506).

### Average nucleotide identity calculation

Wrongly annotated public *Achromobacter* species from RefSeq database (15) were identified by calculating ANI with fastANI 1.11 (16) using 95% threshold.

## **Aggregated pan-genome generation, characterization and visualization**

Aggregated pan-genome was created by clustering all pan-genomes from longitudinally collected lineages and *de novo* assemblies from single-isolate lineages with GenAPI. (13) Every gene in the aggregated pan-genome was then aligned back to the individual pan-genomes/*de novo* assemblies to determine if the gene is (1) non-present in the lineage, (2) present and variable within the lineage or (3) present and non-variable. A matrix for an aggregated pan-genome was generated for 26 longitudinal lineages and 35 single-isolate lineages, and visualized using R (17) with a heatmap library. (18)

## **Bacterial genome alignment and variant calling**

Alignments, variant calling and pairwise SNP distance identification for *Achromobacter* isolates were performed using reference genome (GCF\_001051055.1 for *A. ruhlandii* (AX01 group), GCF\_001558755.2 for *A. insuavis* (AX02 group) and GCF\_001457475.1 for *A. xylosoxidans* (AX03 group)) with BacDist (19) workflow that is based on variant calling with Snippy. (20) Sequence alignments on average included 84% (81.72%–89.58%) of the raw sequencing reads for *A. ruhlandii*, 87% (75.45%–92.57%) for *A. insuavis* and 86% (75.95%–93.61%) for *A. xylosoxidans*. Low-quality variants or variants shared among all isolates were discarded by BacDist.

## **Substitution rate estimation**

The nucleotide substitution rate (21) estimation was performed for each lineage containing 3 or more isolates sampled at different timepoints (10 lineages in total) by using BEAST 2.6.1. (22) Sequence alignments from BacDist were used as input with the following parameters: (1) sequences were annotated with the sampling date (“dated tips”), (2) HKY substitution model with strict clock parameters, (3) gamma prior for clock rate, (4) prior for population size: 1/X, (5) tree prior: coalescent constant population. MCMC was run for 50,000,000 iterations. Convergence was checked by inspecting an effective sample size and parameter

value traces in the Tracer 1.7.1 software. (23) Multiple tests for each sample were performed to ensure reproducibility and convergence. The obtained clock rate (per site per year) was multiplied by the alignment size to obtain a substitution rate per genome per year.

### **Virulence and antibiotic resistance gene identification**

Orthologs of resistance and virulence genes in 61 *Achromobacter* lineages were identified with Abricate (24) using VFDB (containing 2,597 genes; retrieved: 2020.09.21) (25) for virulence genes and Resfinder 4 (containing 3,122 genes; retrieved: 2020.09.21) (26) for resistance genes. Gene ortholog was considered present in the corresponding database if the alignment made up minimum 50% of the gene length and its identity was minimum 75%.

### **Frequently mutated gene definition**

Most frequently mutated genes were defined as the top 1% of all mutated genes for the species. If there were more genes mutated with the same frequency as the 1% most frequently mutated genes, these genes were also included in the final analysis. The identified most mutated genes were annotated by EGGNOG-mapper 2.0.1 (27) using DIAMOND and EGGNOG's bacterial database.

*P. aeruginosa* orthologs were identified by performing clustering with CD-HIT (28) using word size of 3 and 50% identity thresholds. Joint *Achromobacter* most frequently mutated genes were identified by clustering with CD-HIT (28) with word size of 3 and 80% identity threshold.

### **Genome-wide association study with antibiotic resistance phenotypes**

DBGWAS 0.5.4 (29) software was used for bacterial genome-wide association analysis using 10 (Amoxicillin-Clavulanate (AMC), Ceftazidime (CAZ), Chloramphenicol (CHL), Colistin (CST), Imipenem (IPM), Meropenem (MEM), Piperacillin-Tazobactam (TZP), Sulfamethizole (SMZ), Tigecycline (TGC) and Trimethoprim-Sulfamethoxazole (SXT)) different antibiotic resistance phenotypes and *de novo* assembled scaffolds of 92 isolates for

which the antibiotic susceptibility profiles were available (Gabrielaite *et al.*, 2020 (11) for detailed information on isolate susceptibility). Core genome SNP-based phylogenetic tree was used to correct for population structure while all available annotations of *Achromobacter* genes from UniProt database (30) were used for unitig annotation (271,851 genes; retrieved: 2020.04.19). Ten most significant unitigs for each antibiotic test were used for further analysis as the tool authors advise against using a p-value threshold when testing several phenotypes. (29) *Achromobacter* gene annotations were identified by clustering significant unitig gene sequences with CD-HIT (28) with word size of 3 and 80% identity threshold. Enrichment of COG annotated genes was estimated by comparing the fraction of the associated genes with the fraction in the *Achromobacter* reference genomes for the 5 most frequently associated gene groups where more than one gene was present in a group.

## Results

### ***Achromobacter* dataset and incorrect annotations of public genomes**

The genomes of 101 *Achromobacter* isolates from the airways of 51 patients with CF attending the Copenhagen Cystic Fibrosis Center at Rigshospitalet were sequenced to follow the within-host evolution and genetic adaptation of the lineages over the initial 0–20 years of infection (Figure 1). All isolates were previously defined as belonging to 5 different species: *A. ruhlandii* (N=29), *A. insuavis* (N=18), *A. xylosoxidans* (N=52), *A. aegrifaciens* (N=1) and a new genogroup (N=1). The latter two species were excluded from further analysis as the species contained only a single isolate. The remaining 99 *Achromobacter* genomes were grouped to 61 lineages which were defined as all isolates from one patient belonging to the same species and clone type.

We first performed phylogenetic analysis for all *Achromobacter* genomes available in the RefSeq database (141 samples, Table S1) together with our clinical *Achromobacter* genomes. Our sequenced genomes were widely distributed across the genetic variability observed

within *A. insuavis* and *A. xylosoxidans* group; however, *A. ruhlandii* isolates, of which the majority (27/29) belonged to Danish epidemic strain (DES), reflected little genetic variability of *A. ruhlandii* species. Furthermore, our phylogenetic and average nucleotide identity (ANI) analysis revealed that *Achromobacter* annotations are inconsistent among the RefSeq genomes and require corrections to improve species designation (Figure 2A, suggested corrections in Table S1).

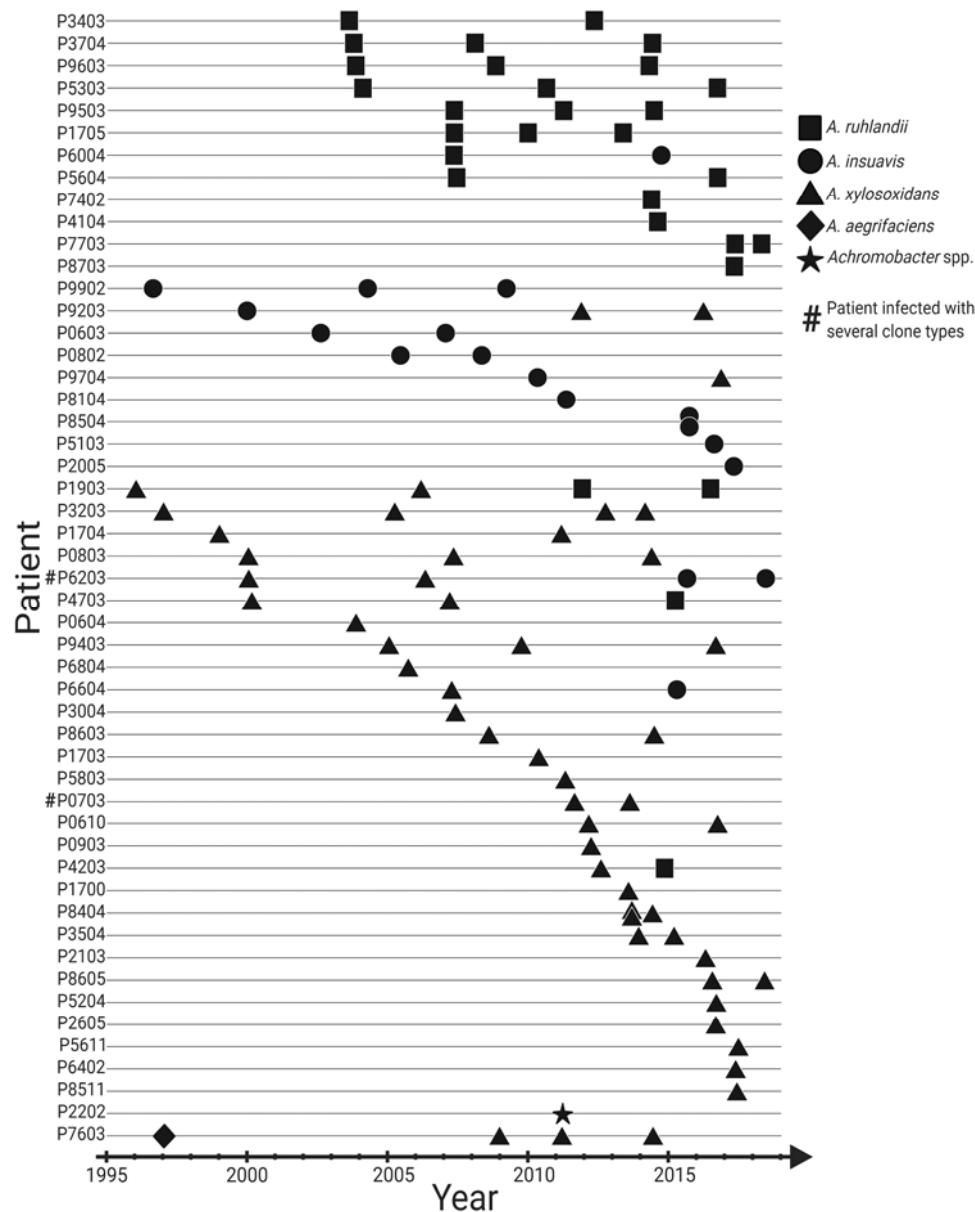

**Figure 1. Overview of 101 longitudinally collected *Achromobacter* isolates from patients with CF.**



### Aggregated pan-genome

Aggregated pan-genome was constructed from pan-genomes of each of the 61 lineages (35 of which were single-isolate lineages). This approach allowed us to account for the nature of the dataset where multiple clonal isolates from the same patient were available. The aggregated *Achromobacter* pan-genome consisted of 21,198 genes: 2,887 core genes, 18,311 accessory genes of which 6,917 genes were unique to a single lineage.

The aggregated pan-genome (Figure 2B) contained *Achromobacter* species-specific genes (649 for *A. ruhlandii*, 648 for *A. insuavis*, and 494 for *A. xylosoxidans*) present in all isolates of the respective species but not in the isolates from other species. Pan-genomes for each *Achromobacter* species were defined by using all bacterial isolates available (18–52) for the species. The size of the species' pan-genomes contained 7,070–14,833 genes, of which 4,225–5,130 were core genes, 1,940–10,608 accessory genes and 976–3,162 isolate-unique genes (Table 1).

**Table 1.** Pan-genome size, number of core, accessory and unique genes for isolates from each *Achromobacter* species.

| Species                | Number of bacterial isolates | Pan-genome size | Core genes | Accessory genes | Unique genes |
|------------------------|------------------------------|-----------------|------------|-----------------|--------------|
| <i>A. ruhlandii</i>    | 29                           | 7,070           | 5,130      | 1,940           | 976          |
| <i>A. insuavis</i>     | 18                           | 9,900           | 4,799      | 5,101           | 1,124        |
| <i>A. xylosoxidans</i> | 52                           | 14,833          | 4,225      | 10,608          | 3,162        |

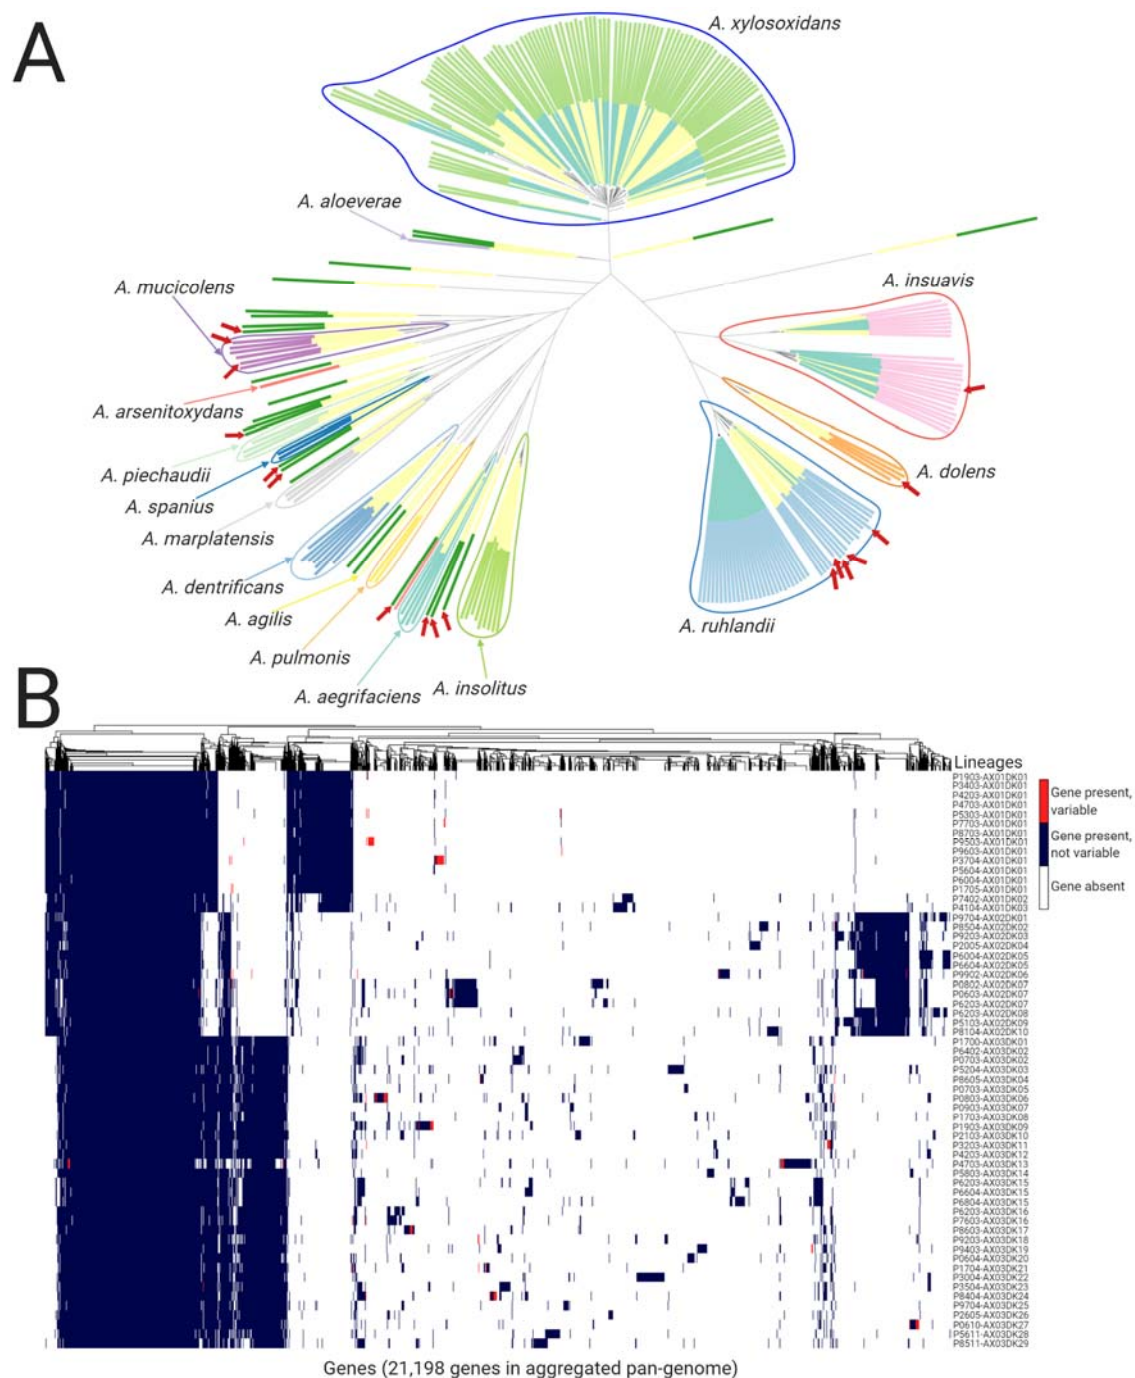

**Figure 2. *Achromobacter* genetic differences.** (A) Phylogenetic tree based on core genome SNPs of 101 *Achromobacter* isolates from patients with CF (inner layer of colors: turquoise) and 141 *Achromobacter* isolates from RefSeq database (inner layer of colors: yellow). Outer layer of colors corresponds to species annotation with suggested corrections; red arrows mark supposedly incorrect species annotation in RefSeq isolates. The phylogenetic tree can be accessed on Microreact webserver (62). (B) The aggregated pan-genome of 61 *Achromobacter* lineages containing gene presence, absence, and gene variability (i.e., gene is present in some isolates while absent in other isolates within the lineage) information.

### ***Achromobacter* substitution rates**

Within-patient bacterial substitution rate was estimated for lineages where three or more *Achromobacter* isolates from different timepoints were available (five lineages for *A. ruhlandii*, four for *A. xylosoxidans*, and one for *A. insuavis*). The estimated substitution rates for *A. ruhlandii* (DES isolates which are known hypermutators (11,31)) were on average  $4.18 \cdot 10^{-6}$  ( $2.71 \cdot 10^{-6}$ – $5.39 \cdot 10^{-6}$ ) SNPs/year/site,  $8.77 \cdot 10^{-7}$  ( $6.17 \cdot 10^{-7}$ – $1.13 \cdot 10^{-6}$ ) SNPs/year/site for *A. xylosoxidans* (0332-AX03DK11 hypermutator lineage (11) with the mutation rate of  $2.37 \cdot 10^{-6}$  SNPs/year/site was excluded), and  $1.61 \cdot 10^{-7}$  SNPs/year/site for *A. insuavis*. These substitution rates correspond to an average of 21.5, 2.19 and 0.79 SNPs/year/genome for *A. ruhlandii*, *A. xylosoxidans* and *A. insuavis*, respectively (Figure S1).

### **Virulence and antibiotic resistance genes carried by *Achromobacter* genomes**

From *de novo* assembled genomes of the 99 *Achromobacter* isolates we identified virulence (VFDB database) and antibiotic resistance (Resfinder database) gene orthologs. On average, bacterial isolates carried 2 (0–3) antibiotic resistance gene orthologs and 13 (8–18) virulence gene orthologs. The most frequently carried antibiotic resistance gene was the ortholog of *catB10* which codes for chloramphenicol acetyltransferase. Interestingly, the gene was carried by all *A. ruhlandii* and nearly all (30/33) *A. xylosoxidans* lineages but none of the *A. insuavis* lineages (Figure 3A). Furthermore, OXA-type class D  $\beta$ -lactamase bla<sub>OXA-258</sub> was observed in all *A. ruhlandii* isolates and bla<sub>OXA-114</sub>—in all but one (P7034-AX03DK13) *A. xylosoxidans* lineages. All 13 *A. insuavis* isolates carried one of the following bla<sub>OXA</sub> genes: bla<sub>OXA-243</sub>, bla<sub>OXA-455</sub>, bla<sub>OXA-457</sub>, bla<sub>OXA-458</sub> or bla<sub>OXA-459</sub>. All bla<sub>OXA</sub> genes carried by *A. insuavis* had  $\geq 92\%$  nucleotide identity. The latest isolate of DES (P7703-AX01DK01)

appears to have acquired a new aph(6)-Id antibiotic resistance gene ortholog encoding for aminoglycoside resistance. (32)

The median number of virulence genes in *A. ruhlandii* DES genomes was markedly lower (N=8) than other *Achromobacter* isolates (N=14; p-value=5.98·10<sup>-8</sup>; Wilcoxon signed-rank test) (Figure 3A). The majority of virulence gene orthologs belonged to the secretion system (N=9), motility (N=7), and endotoxin (N=5) gene orthologs. (25)

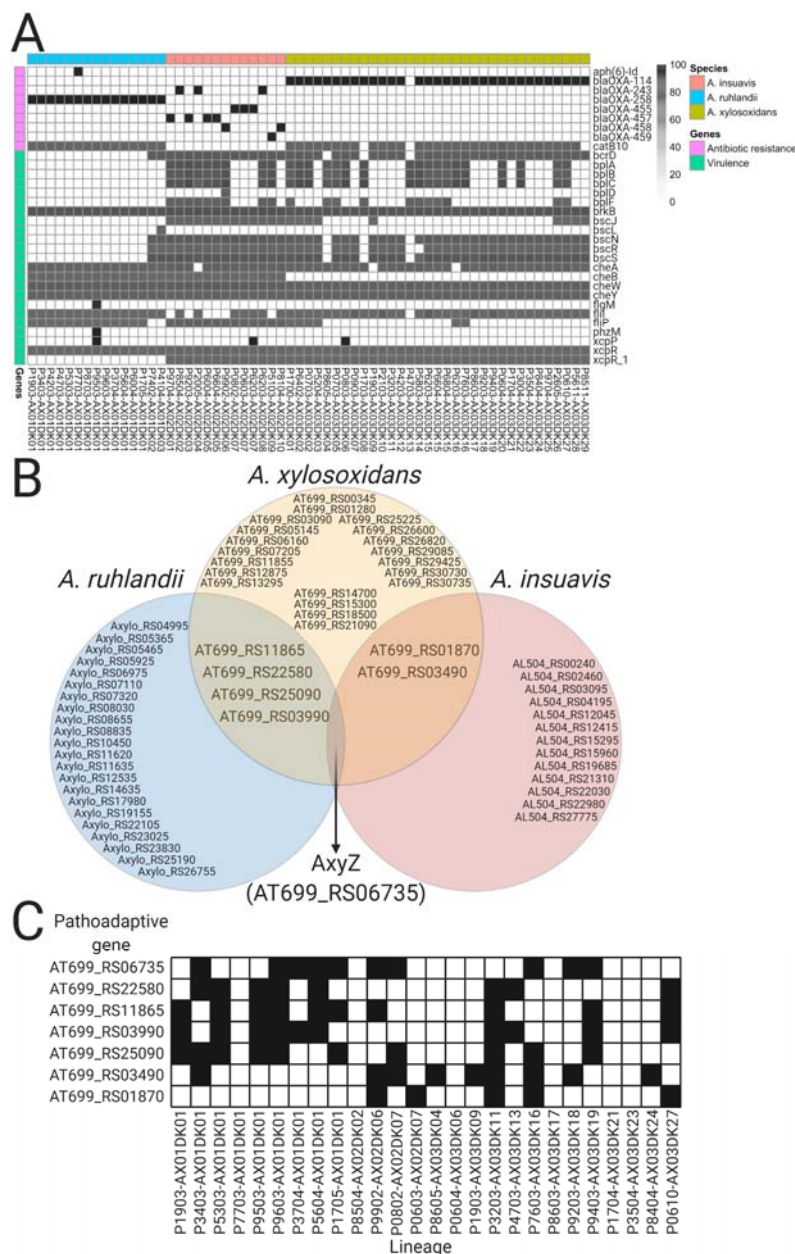

**Figure 3. Overview of genetic determinants related to virulence and antibiotic resistance, and pathoadaptive genes. (A) Antibiotic resistance and virulence gene ortholog**

distribution among lineages. (B) Venn diagram of the most frequently mutated genes and their overlap between the three *Achromobacter* species. (C) Candidate pathoadaptive gene mutation distribution by lineage.

### Genetic adaptation: Mutations of the same genes across lineages

To explore within-host genetic adaptation in *Achromobacter*, we first identified the genes which were most frequently mutated within each species. Genes were defined as frequently mutated if they were among the 1% most commonly mutated genes within species. If more than 1% of the genes were mutated with the same frequency, those genes were also included in the analysis. A total of 27, 16, and 28 genes were identified as most frequently mutated for *A. ruhlandii*, *A. insuavis*, and *A. xylosoxidans*, respectively (Figure 3B). The clusters of orthologous groups (COG) functional annotations were performed for all species (Figure 4A; Table S2 for detailed information) with the highest mutation frequency in genes coding for signal transduction (COG T); inorganic ion transport and metabolism (COG P); replication, recombination and repair (COG L); intracellular trafficking, secretion and vesicular transport (COG U); and transcription (COG K).

Although knowledge is lacking about many *Achromobacter* gene functions, bacterial sequence similarity analysis allowed us to identify possible antibiotic resistance and virulence-related genes among the most frequently mutated genes in *Achromobacter*. After manual literature search 10, 4 and 4 genes were defined as related to antibiotic resistance in *A. ruhlandii*, *A. insuavis* and *A. xylosoxidans*, respectively, whereas 8, 2 and 7 genes were defined as virulence-related genes (Table S2).

Ortholog search of a previously defined list of 52 CF-associated pathoadaptive *P. aeruginosa* genes revealed three orthologs among the most frequently mutated *Achromobacter* genes: *mexZ* (WP\_006389199.1), *mexB* (WP\_024068614.1) and *gyrA* (WP\_049072335.1).

Seven genes were defined as candidate pathoadaptive genes in several *Achromobacter* species. One gene was frequently mutated in all three species (10 out of 26 lineages) and six

genes were observed as most frequently mutated in two of the *Achromobacter* species (Figure 3C; Table 2). Six lineages did not acquire a single mutation in any of the seven pathoadaptive genes; however, 13 lineages acquired mutations in three or more genes (Figure 3C). Lineages which acquired mutations in three or more pathoadaptive genes acquired significantly less non-synonymous mutations than lineages with less mutated pathoadaptive genes (p-value=4.99·10<sup>-2</sup>; Fisher's exact test). Furthermore, lineages only acquired non-synonymous mutations in the seven candidate pathoadaptive genes (Table S3).

**Table 2.** Seven most frequently mutated genes and their function.

| RefSeq ID<br>(Locus tag)          | No. of<br>species | No. of<br>lineages | Product                                       | Function                   |
|-----------------------------------|-------------------|--------------------|-----------------------------------------------|----------------------------|
| WP_006389199.1<br>(AT699_RS06735) | 3                 | 10                 | DNA-binding transcriptional<br>regulator AxyZ | Antibiotic<br>resistance   |
| WP_006227290.1<br>(AT699_RS01870) | 2                 | 5                  | NAD(P)/FAD-dependent<br>oxidoreductase        | Metabolic<br>pathways      |
| WP_013391523.1<br>(AT699_RS03490) | 2                 | 10                 | penicillin-binding protein 2                  | Antibiotic<br>resistance   |
| WP_006392856.1<br>(AT699_RS03490) | 2                 | 9                  | ABC transporter substrate-<br>binding protein | Transport                  |
| WP_006394390.1<br>(AT699_RS11865) | 2                 | 9                  | multidrug efflux RND<br>transporter permease  | Antibiotic<br>resistance   |
| WP_006387572.1<br>(AT699_RS22580) | 2                 | 8                  | Signal transduction histidine<br>kinase       | Two-component<br>signaling |
| WP_006221301.1<br>(AT699_RS25090) | 2                 | 10                 | TonB-dependent hemin,<br>ferrichrome receptor | Transport                  |



The only pathoadaptive gene which was frequently mutated among all three species—*axyZ*—encodes TetR family transcriptional regulator of the RND-type efflux system and is associated with innate *Achromobacter* antibiotic resistance. (33,34) Furthermore, we observed higher overall antibiotic tolerance by isolates which acquired mutations in *axyZ* gene with highest antibiotic resistance increase against piperacillin/tazobactam (p-value= $3.28 \cdot 10^{-2}$ ; Fisher's exact test) and meropenem (p-value= $2.87 \cdot 10^{-3}$ ; Fisher's exact test).

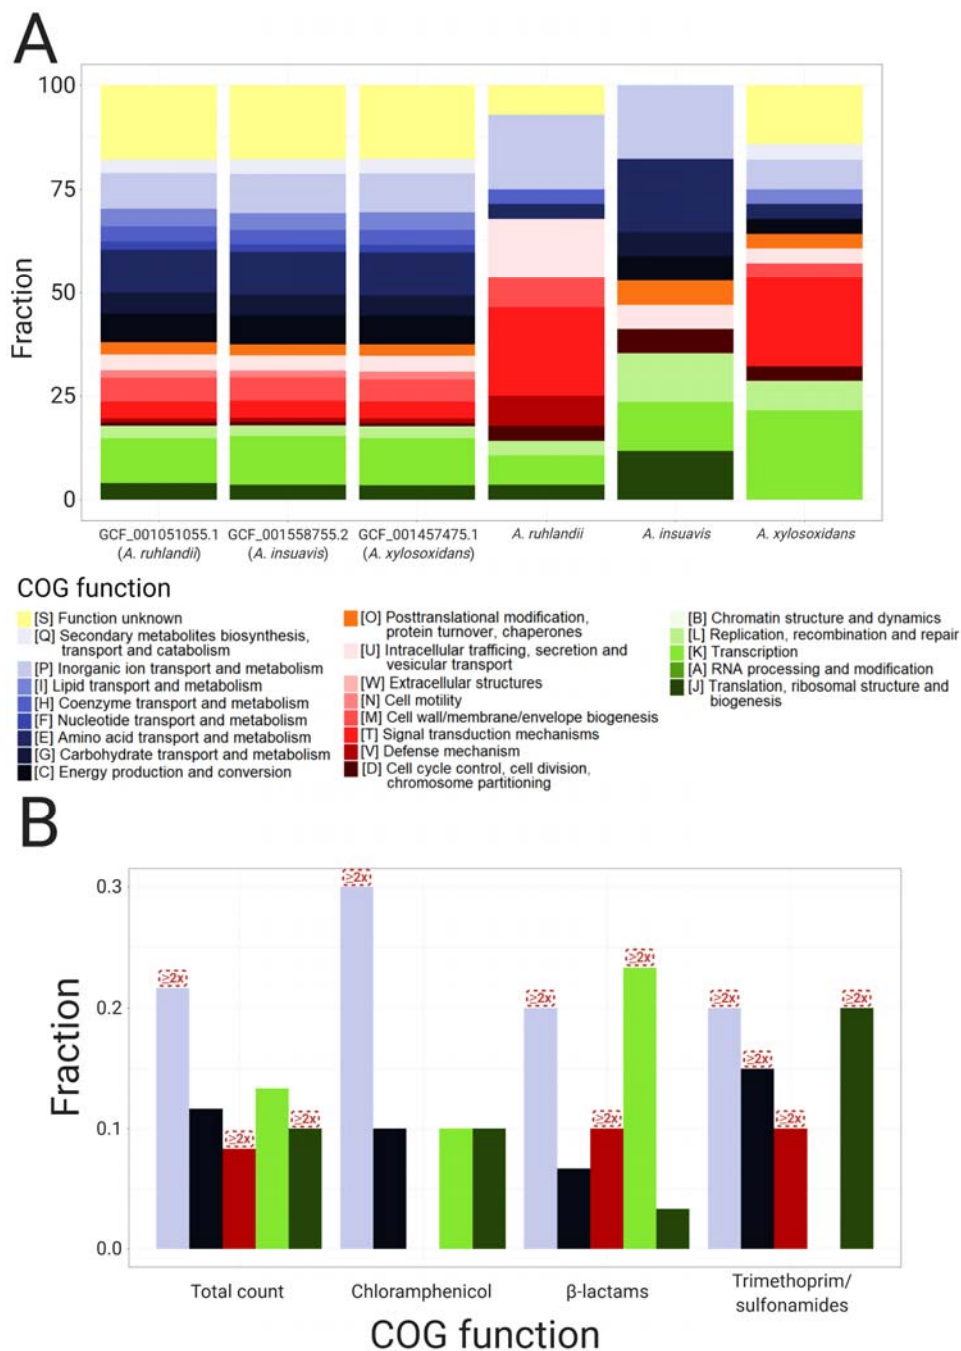

**Figure 4. COG annotations of (A) three *Achromobacter* reference genomes and most frequently mutated genes, and (B) frequently associated with antibiotic resistance units. Red boxes mark COGs which are  $\geq 2x$  enriched in GWAS compared to reference genomes.**

The ratio of non-synonymous to synonymous substitutions (dN/dS) was significantly different between the 1% most frequently mutated genes and non-frequently mutated genes



in *Achromobacter* ( $dN/dS_{99\%}=1.21$  vs  $dN/dS_{1\%}=2.10$ ; Fisher's exact test;  $p=3.4 \cdot 10^{-4}$ , respectively).

Finally, we investigated gene loss and acquisition patterns in 26 longitudinally collected *Achromobacter* lineages. We observed genes to be 2 times more often lost than acquired, and lost/acquired in groups rather than individually; however, no convergent evolution patterns in *Achromobacter* gene loss/acquisition were identified (detailed analysis in Text S1).

### **Genome-wide association between *Achromobacter* genotypes and antibiotic resistance**

To test for associations between bacterial genetics and antibiotic resistance phenotypes we performed unitig-based DBGWAS analysis. Out of 21 antibiotics where the resistance was phenotypically tested, only 10 antibiotics had both susceptible and resistant isolates from all three *Achromobacter* species. Accordingly, we performed the association analysis for these 10 antibiotics (see Materials and Methods for detailed information). Unitigs passed a 5% FDR corrected q-value threshold only for CHL, IPM, MEM, TZP, SMZ and SXT. Ten most significant unitigs were used for the six remainder association test analysis, resulting in 60 genes (50 unique genes) significantly associated with antibiotic resistance phenotypes (Figure 4B; Table S5). The most abundant group of associated unitigs belonged to inorganic ion transport ( $N=13$ ; 2.4x enriched; COG P) genes. The other four most abundantly associated genes belonged to transcription ( $N=8$ ; COG K); energy production and conversion ( $N=7$ ; COG C); translation, ribosomal structure and biogenesis ( $N=6$ ; COG J), and defense mechanism ( $N=5$ ; COG V) groups. Furthermore, transcription genes were enriched in the  $\beta$ -lactam (IPM, MEM and TZP) antibiotic group ( $N=7$ ; 2.1x enriched) while translation, ribosomal structure and biogenesis genes were 5.4x enriched in trimethoprim/sulfonamides (SMZ and SXT) group ( $N=4$ ). Defense mechanism genes were 9.2x and 9.0x enriched in  $\beta$ -lactam and trimethoprim/sulfonamide groups, respectively while energy production and conversion genes were 2.9x enriched in a trimethoprim/sulfonamide group.

Of 9 antibiotic resistance genes from the ResFinder 4 database which were present in the aggregated pan-genome, none were associated with antibiotic resistance phenotypes in the GWAS analysis. Furthermore, core and accessory genes were equally associated with antibiotic resistance phenotypes (Table S5).

## Discussion

*Achromobacter* is an emerging pathogen causing chronic respiratory tract airway infections in patients with CF; however, the genetic epidemiology of these infections is little understood. We sequenced and analyzed 101 genomes of *Achromobacter* isolates from 51 patients with CF which is the largest longitudinally collected *Achromobacter* genome dataset available to-date. This allowed us to investigate the population genomics and within-host adaptation, including genome-wide association analysis with antibiotic resistance phenotypes.

Phylogenetic analysis of our dataset with 141 publicly available *Achromobacter* genomes from the RefSeq database revealed that our dataset well represented the genetic diversity of *A. xylosoxidans* and *A. insuavis* species. However, because of DES overrepresentation, *A. ruhlandii* isolates did not reflect the species genetic diversity. Furthermore, ANI together with core-genome based phylogenetic analysis revealed that more than 10% of publicly available *Achromobacter* genomes are supposedly misannotated in the RefSeq database which we anticipated to unravel to ease future research on *Achromobacter* (Table S1).

From the aggregated pan-genome analysis we showed that core genome sizes were comparable between *A. ruhlandii*, *A. insuavis* and *A. xylosoxidans* which are similar to core genome size identified previously by Li *et al.* 2013 (35). Nevertheless, the number of accessory and unique genes in species' pan-genomes varied greatly as a result of the different

number of independent genomes for each species. *A. ruhlandii* isolates mostly belonged to DES, which is spread through patient-to-patient transmission (11,31), therefore, have lower pan-genome plasticity than *A. xylosoxidans* or *A. insuavis*.

Unlike many bacterial species, substitution rates for *Achromobacter* are not known. (36) Our *A. ruhlandii* dataset only consisted of hypermutator DES lineages which led to a high substitution rate estimate, and our substitution rate estimate for *A. insuavis* was based on only one longitudinally sampled lineage. *A. xylosoxidans* ( $8.77 \cdot 10^{-7}$  SNPs/year per site) substitution rate is comparable to other Gram-negative bacterial species: *P. aeruginosa* ( $4.0 \cdot 10^{-7}$  SNPs/year per site) (37), *Shigella sonnei* ( $6.0 \cdot 10^{-7}$  SNPs/year per site) (38), *Escherichia coli* ( $2.26 \cdot 10^{-7}$  SNPs/year per site) (39). The substitution rate is substantially lower than *S. aureus* ( $1.87 \cdot 10^{-6}$  SNPs/year per site) (40) or *Klebsiella pneumoniae* ( $1.9 \cdot 10^{-6}$  SNPs/year per site) (41).

While it was previously suggested to use *bla*<sub>OXA</sub> genes for *Achromobacter* species typing (42–44), we showed that in some cases such strategy would not be sufficient for species identification as isolates can carry none of the *bla*<sub>OXA</sub> genes. Furthermore, we identified that *A. insuavis* can carry one out of several highly similar *bla*<sub>OXA</sub> genes which might further complicate such species typing approach. We also show that none of the *A. insuavis* isolates carried *catB10* chloramphenicol resistance gene ortholog; however, these identified resistance genes alone were not sufficient to explain the differences in antibiotic resistance phenotype between lineages and species.

Moreover, virulence gene ortholog analysis revealed that *Achromobacter* carries several virulence factors with markedly less virulence genes in *A. ruhlandii* DES strain which further supports the adaptive trade-off evolution hypothesis that virulence genes are not required or

are selected against in chronic infections. (36) However, several virulence gene orthologs coding for host cell invasion (*cheW* and *cheY*) and facilitating evasion of the host immune response (*brkB* (45)) were observed in all lineages. Furthermore, our findings of secretion system, in particular type III secretion system, gene orthologs as the most prevalent virulence genes in *Achromobacter* are in line with findings by Jeukens *et al.* 2017 and Li *et al.* 2013. (35,46)

Among the candidate pathoadaptive genes (frequently mutated genes), we identified multiple antibiotic resistance genes which were markedly more frequently mutated among *A. ruhlandii* isolates than *A. insuavis* or *A. xylosoxidans* isolates. This phenomenon might signal about the continuous adaptive evolution even in highly antibiotic-resistant strains such as DES. (1) Nonetheless, more antibiotic resistance and virulence genes among frequently mutated genes might be identified if gene annotation of *Achromobacter* reference genomes improved. Overall, our identified candidate pathoadaptive genes (belonging to signal transduction; inorganic ion transport and metabolism; intracellular trafficking; transcription; and replication gene functional classes) are comparable to the observations in *P. aeruginosa* infecting patients with CF (47) and other smaller-scale studies on *Achromobacter*. (46)

Furthermore, we highlight that not all *Achromobacter* lineages seem to undergo the same amount of selective pressure, and we show from the 7 pathoadaptive *Achromobacter* gene analysis that lineages tended to either have acquired not more than 2 pathoadaptive mutations and be under stronger positive selection or have acquired mutations in more pathoadaptive genes and be under weaker/neutral selection. These findings are comparable to findings from genetic adaptation studies in *P. aeruginosa* from patients with CF airway. (47) Overall, significantly higher dN/dS ratio in the 27, 16 and 28 most frequently mutated *A. ruhlandii*, *A. insuavis* and *A. xylosoxidans* genes confirms that there is strong selective pressure for

changes in these genes during adaptation to the patients with CF airway. Altogether,  $dN/dS > 1$  in both frequently and non-frequently mutated genes show that more than the top 1% mutated genes are under selective pressure; nonetheless, a larger dataset is needed to identify more genes without sacrificing analysis accuracy.

*AxyZ* (*mexZ* ortholog), which was the only candidate pathoadaptive gene in all three species, is involved in the development of multidrug resistance by regulating AxyXY-OprZ RND-type efflux system, hence is crucial during adaptation to the host environment. (34) *AxyZ* ortholog *mexZ* in *P. aeruginosa* is established among pathoadaptive genes directly associated with increase in antibiotic resistance. (48–50) Furthermore, mutations in *axyZ* could partially explain the increased tolerance to piperacillin/tazobactam and meropenem.

The observed gene loss and acquisition patterns were comparable to the ones observed in *P. aeruginosa*; however, unlike in *P. aeruginosa*, no convergent loss or acquisition of gene clusters was observed. (51)

To further explore the differences in antibiotic susceptibility between *Achromobacter* isolates, we performed a k-mer based GWAS analysis. Limited number of bacterial isolates and high innate resistance to certain antibiotics restricted our analysis to only six successful GWAS associations which revealed that inorganic ion transport genes contribute to antibiotic resistance development in all six antibiotics. Changes in inorganic ion transport genes (COG P) could have a secondary influence on antibiotic resistance as such changes help overcome the problem of iron deficiency in human airways allowing better intrinsically resistant bacteria survival despite the presence of antibiotics. Similar patterns were previously identified in other bacteria causing chronic infections in patients with CF. (36,52,53) Another possible explanation is that many inorganic ion transport genes are related to efflux pumps and transporter genes which markedly contribute to increase in antibiotic resistance. (54,55)

The observed enrichment of transcription genes (COG K) associated with resistance to  $\beta$ -lactams could be explained by changes in transcriptional regulation of intrinsic antibiotic resistance, efflux pump and cell wall protein coding genes. (54,56,57) Enrichment of translation and ribosomal structure genes (COG J), and energy production genes (COG C) in trimethoprim/sulfonamide group might be due to altered metabolism and changes in energy production leading to bacterial persistence and escape of antibiotic effect. (58,59) Ultimately, GWAS is a promising approach for a systematic innately complex bacterial resistance analysis which could be applied to better understand the genetics of antibiotic resistance development.

Our study has several limitations. First, even larger studies are necessary to further characterize and identify the genetic adaptation of *Achromobacter* during CF airway infections. Second, the lack of genome annotation and overall knowledge about *Achromobacter* limited the interpretation of putative pathoadaptive genes and genes associated with resistance phenotypes. Finally, a single isolate at a given time point is not sufficient to completely reflect the genetic diversity of the bacterial population (60,61); therefore, some of our findings might be the result of diversification and not the fixation of the adaptive mutations in *Achromobacter*.

## Conclusions

In conclusion, by using the largest dataset to-date of *Achromobacter* clinical isolates from patients with CF, we used a comprehensive analytical framework for thorough bacterial genomic data analysis. Thus, we identified pathoadaptive and antibiotic resistance genes in *Achromobacter* causing CF airway infections. Furthermore, we showed that current knowledge about antibiotic resistance gene presence or mutations in those genes cannot

sufficiently explain the resistance phenotypes, and GWAS offers a new approach of addressing this problem. The gained knowledge allows us to better understand the requirements for successful *Achromobacter* adaptation during infection in airways of patients with CF which could help accurately predict antibiotic susceptibility and clinical progression of *Achromobacter* infections, and further the development of urgently needed optimized treatment strategies.

## List of abbreviations

AMC: Amoxicillin-Clavulanate  
 ANI: Average nucleotide identity  
 CAZ: Ceftazidime  
 CHL: Chloramphenicol  
 COG: Clusters of Orthologous Groups  
 CST: Colistin  
 CF: Cystic fibrosis  
 DES: Danish epidemic strain  
 GWAS: Genome-wide association study  
 IPM: Imipenem  
 MCMC: Markov chain Monte Carlo  
 MEM: Meropenem  
 TZP: Piperacillin-Tazobactam  
 SMZ: Sulfamethizole  
 SNP: Single nucleotide polymorphism  
 TGC: Tigecycline  
 SXT: Trimethoprim-Sulfamethoxazole  
 WGS: Whole genome sequence

## Availability of data and materials

*Achromobacter* whole genome sequencing data is available at European Nucleotide Archive under study accession number PRJEB39108.

## Acknowledgments

Ulla Johansen is thanked for expert technical assistance and Niels Høiby is thanked for collecting the earliest *Achromobacter* isolates. All figures were partly or completely created using BioRender (<https://biorender.com/>).

## Funding

This work was supported by the Danish Cystic Fibrosis Association (Cystisk Fibrose Foreningen) and the Danish National Research Foundation (grant number 126). HKJ was supported by The Novo Nordisk Foundation as a clinical research stipend (NNF12OC1015920), by Rigshospitalets Rammebevilling 2015-17 (R88-A3537), by Lundbeckfonden (R167-2013-15229), by Novo Nordisk Fonden (NNF15OC0017444), by RegionH Rammebevilling (R144-A5287) by Independent Research Fund Denmark / Medical and Health Sciences (FTP-4183-00051) and by ‘Savværksejer Jeppe Juhl og Hustru Ovita Juhls mindelegat’.

## Disclosure declaration

We declare no conflict of interest.

## Contributions

R.L.M. and H.K.J conceived the study. R.L.M., H.K.J. and F.C.N supervised the study. M.G. and R.L.M. designed the bioinformatics workflows for the analysis. M.G. conducted the analysis. M.G., and R.L.M. analyzed and interpreted the data. M.G. prepared the manuscript draft and visualizations. R.L.M., H.K.J., and F.C.N reviewed and edited the draft.

## Ethics declarations

Use of the stored clinical isolates was approved by the local ethics committee at the Capital Region of Denmark RegionH (registration number H-4-2015-FSP).



## Supplementary information

**Text S1.** *Achromobacter* gene presence-absence analysis results.

**Table S1.** Table of publicly available RefSeq *Achromobacter* sequences with original and new proposed annotations which were based on ANI and core genome SNP-based phylogeny.

**Table S2.** List of most frequently mutated genes in *Achromobacter ruhlandii*, *Achromobacter insuavis* and *Achromobacter xylosoxidans* with their COG function, corresponding E-value, gene description and gene relatedness to antibiotic resistance or virulence with references defining gene's relatedness to antibiotic resistance or virulence are provided where relevant.

**Table S3.** All mutations acquired by lineages in the 7 pathoadaptive genes which were frequently mutated in at least two *Achromobacter* species. Amino acid coordinates are based on the corresponding species' reference genome genes.

**Table S4.** Table of pan-genome, core, accessory and unique genes in *Achromobacter* lineages. Variable genes are separated by whether they were (1) lost or acquired and (2) variable in a group or individually.

**Table S5.** The most significant GWAS associations (q-value<0.05) and their annotations.

**Figure S1.** Substitution rate per year average with 95% confidence intervals for *Achromobacter ruhlandii* (DES) and *Achromobacter xylosoxidans*.

**Figure S2.** COG annotation of the aggregated pan-genome and most frequently lost or acquired genes.

## References

1. Ridderberg W, Nielsen SM, Nørskov-Lauritsen N. Genetic Adaptation of *Achromobacter* sp. during Persistence in the Lungs of Cystic Fibrosis Patients. *PLoS ONE*. 2015 Aug 27;10(8):e0136790.
2. Ciofu O, Hansen CR, Høiby N. Respiratory bacterial infections in cystic fibrosis. *Curr Opin Pulm Med*. 2013 May;19(3):251–8.
3. Folkesson A, Jelsbak L, Yang L, Johansen HK, Ciofu O, Høiby N, et al. Adaptation of *Pseudomonas aeruginosa* to the cystic fibrosis airway: an evolutionary perspective. *Nat Rev Microbiol*. 2012 Dec;10(12):841–51.
4. Baishya J, Wakeman CA. Selective pressures during chronic infection drive microbial competition and cooperation. *npj Biofilms and Microbiomes*. 2019 Jun 7;5:16.
5. Callaghan M, McClean S. Bacterial host interactions in cystic fibrosis. *Curr Opin Microbiol*. 2012 Feb;15(1):71–7.
6. McGuigan L, Callaghan M. The evolving dynamics of the microbial community in the cystic fibrosis lung. *Environ Microbiol*. 2015 Jan;17(1):16–28.
7. Gade SS, Nørskov-Lauritsen N, Ridderberg W. Prevalence and species distribution of *Achromobacter* sp. cultured from cystic fibrosis patients attending the Aarhus centre in Denmark. *J Med Microbiol*. 2017 May 8;66(5):686–9.
8. Gordon NC, Price JR, Cole K, Everitt R, Morgan M, Finney J, et al. Prediction of *Staphylococcus aureus* antimicrobial resistance by whole-genome sequencing. *J Clin Microbiol*. 2014 Apr;52(4):1182–91.
9. Nguyen M, Long SW, McDermott PF, Olsen RJ, Olson R, Stevens RL, et al. Using machine learning to predict antimicrobial mics and associated genomic features for nontyphoidal salmonella. *J Clin Microbiol*. 2019 Jan 30;57(2).
10. Su M, Satola SW, Read TD. Genome-Based Prediction of Bacterial Antibiotic Resistance. *J Clin Microbiol*. 2019 Feb 27;57(3).
11. Gabrielaite M, Bartell JA, Nørskov-Lauritsen N, Pressler T, Nielsen FC, Johansen HK, et al. Transmission and antibiotic resistance of *Achromobacter* in cystic fibrosis. *BioRxiv*. 2020 Aug 4;
12. Gabrielaite M, Marvig RL. Pactyper: Snakemake pipeline for continuous clone type prediction for WGS sequenced bacterial isolates based on their core genome. *Zenodo*. 2020;
13. Gabrielaite M, Marvig RL. GenAPI: a tool for gene absence-presence identification in fragmented bacterial genome sequences. *BMC Bioinformatics*. 2020 Jul 20;21(1):320.
14. Bankevich A, Nurk S, Antipov D, Gurevich AA, Dvorkin M, Kulikov AS, et al. SPAdes: a new genome assembly algorithm and its applications to single-cell sequencing. *J Comput Biol*. 2012 May;19(5):455–77.
15. O’Leary NA, Wright MW, Brister JR, Ciufo S, Haddad D, McVeigh R, et al. Reference

- sequence (RefSeq) database at NCBI: current status, taxonomic expansion, and functional annotation. *Nucleic Acids Res.* 2016 Jan 4;44(D1):D733-45.
16. Jain C, Rodriguez-R LM, Phillippy AM, Konstantinidis KT, Aluru S. High throughput ANI analysis of 90K prokaryotic genomes reveals clear species boundaries. *Nat Commun.* 2018 Nov 30;9(1):5114.
17. R: The R Project for Statistical Computing [Internet]. [cited 2020 Feb 10]. Available from: <https://www.r-project.org/>
18. CRAN - Package pheatmap [Internet]. [cited 2020 Feb 10]. Available from: <https://cran.r-project.org/web/packages/pheatmap/index.html>
19. Gabrielaite M, Misiakou M-A, Marvig RL. BacDist: Snakemake pipeline for bacterial SNP distance and phylogeny analysis. Zenodo. 2020;
20. Seemann T. Snippy: Rapid haploid variant calling and core genome alignment [Internet]. 2018 [cited 2020 Feb 10]. Available from: <https://github.com/tseemann/snippy>
21. Barrick JE, Lenski RE. Genome dynamics during experimental evolution. *Nat Rev Genet.* 2013 Dec;14(12):827–39.
22. Bouckaert R, Heled J, Kühnert D, Vaughan T, Wu C-H, Xie D, et al. BEAST 2: a software platform for Bayesian evolutionary analysis. *PLoS Comput Biol.* 2014 Apr 10;10(4):e1003537.
23. Rambaut A, Drummond AJ, Xie D, Baele G, Suchard MA. Posterior summarization in bayesian phylogenetics using tracer 1.7. *Syst Biol.* 2018 Sep 1;67(5):901–4.
24. Seemann T. Abricate: Mass screening of contigs for antimicrobial and virulence genes [Internet]. 2018 [cited 2020 Feb 10]. Available from: <https://github.com/tseemann/abicate>
25. Chen L, Zheng D, Liu B, Yang J, Jin Q. VFDB 2016: hierarchical and refined dataset for big data analysis--10 years on. *Nucleic Acids Res.* 2016 Jan 4;44(D1):D694-7.
26. Bortolaia V, Kaas RS, Ruppe E, Roberts MC, Schwarz S, Cattoir V, et al. ResFinder 4.0 for predictions of phenotypes from genotypes. *J Antimicrob Chemother.* 2020 Dec 1;75(12):3491–500.
27. Huerta-Cepas J, Forslund K, Coelho LP, Szklarczyk D, Jensen LJ, von Mering C, et al. Fast Genome-Wide Functional Annotation through Orthology Assignment by eggNOG-Mapper. *Mol Biol Evol.* 2017 Aug 1;34(8):2115–22.
28. Fu L, Niu B, Zhu Z, Wu S, Li W. CD-HIT: accelerated for clustering the next-generation sequencing data. *Bioinformatics.* 2012 Dec 1;28(23):3150–2.
29. Jaillard M, Lima L, Tournoud M, Mahé P, van Belkum A, Lacroix V, et al. A fast and agnostic method for bacterial genome-wide association studies: Bridging the gap between k-mers and genetic events. *PLoS Genet.* 2018 Nov 12;14(11):e1007758.
30. UniProt Consortium. UniProt: a worldwide hub of protein knowledge. *Nucleic Acids*

- Res. 2019 Jan 8;47(D1):D506–15.
31. Ridderberg W, Jensen Handberg K, Nørskov-Lauritsen N. Prevalence of hypermutator isolates of *Achromobacter* spp. from cystic fibrosis patients. *Int J Med Microbiol*. 2020 Jan 16;151393.
  32. Alcock BP, Raphenya AR, Lau TTY, Tsang KK, Bouchard M, Edalatmand A, et al. CARD 2020: antibiotic resistome surveillance with the comprehensive antibiotic resistance database. *Nucleic Acids Res*. 2020 Jan 8;48(D1):D517–25.
  33. Bador J, Amoureux L, Blanc E, Neuwirth C. Innate aminoglycoside resistance of *Achromobacter xylosoxidans* is due to AxyXY-OprZ, an RND-type multidrug efflux pump. *Antimicrob Agents Chemother*. 2013 Jan;57(1):603–5.
  34. Bador J, Neuwirth C, Grangier N, Muniz M, Germé L, Bonnet J, et al. Role of AxyZ Transcriptional Regulator in Overproduction of AxyXY-OprZ Multidrug Efflux System in *Achromobacter* Species Mutants Selected by Tobramycin. *Antimicrob Agents Chemother*. 2017 Jul 25;61(8).
  35. Li X, Hu Y, Gong J, Zhang L, Wang G. Comparative genome characterization of *Achromobacter* members reveals potential genetic determinants facilitating the adaptation to a pathogenic lifestyle. *Appl Microbiol Biotechnol*. 2013 Jul;97(14):6413–25.
  36. Didelot X, Walker AS, Peto TE, Crook DW, Wilson DJ. Within-host evolution of bacterial pathogens. *Nat Rev Microbiol*. 2016 Mar;14(3):150–62.
  37. Marvig RL, Johansen HK, Molin S, Jelsbak L. Genome analysis of a transmissible lineage of *Pseudomonas aeruginosa* reveals pathoadaptive mutations and distinct evolutionary paths of hypermutators. *PLoS Genet*. 2013 Sep 5;9(9):e1003741.
  38. Holt KE, Baker S, Weill F-X, Holmes EC, Kitchen A, Yu J, et al. *Shigella sonnei* genome sequencing and phylogenetic analysis indicate recent global dissemination from Europe. *Nat Genet*. 2012 Sep;44(9):1056–9.
  39. Reeves PR, Liu B, Zhou Z, Li D, Guo D, Ren Y, et al. Rates of mutation and host transmission for an *Escherichia coli* clone over 3 years. *PLoS ONE*. 2011 Oct 27;6(10):e26907.
  40. Young BC, Golubchik T, Batty EM, Fung R, Larner-Svensson H, Votintseva AA, et al. Evolutionary dynamics of *Staphylococcus aureus* during progression from carriage to disease. *Proc Natl Acad Sci USA*. 2012 Mar 20;109(12):4550–5.
  41. Mathers AJ, Stoesser N, Sheppard AE, Pankhurst L, Giess A, Yeh AJ, et al. *Klebsiella pneumoniae* carbapenemase (KPC)-producing *K. pneumoniae* at a single institution: insights into endemicity from whole-genome sequencing. *Antimicrob Agents Chemother*. 2015 Mar;59(3):1656–63.
  42. Turton JF, Mustafa N, Shah J, Hampton CV, Pike R, Kenna DT. Identification of *Achromobacter xylosoxidans* by detection of the bla(OXA-114-like) gene intrinsic in this species. *Diagn Microbiol Infect Dis*. 2011 Jul;70(3):408–11.

43. Papalia M, Almuzara M, Cejas D, Traglia G, Ramírez MS, Galanternik L, et al. OXA-258 from *Achromobacter ruhlandii*: a species-specific marker. *J Clin Microbiol*. 2013 May;51(5):1602–5.
44. Traglia G, Papalia M, Almuzara M, Gutkind G, Centrón D, Vay C, et al. Presence of OXA-type enzymes in *Achromobacter insuavis* and *A. dolens*. *Curr Microbiol*. 2014 Oct;69(4):501–6.
45. Fernandez RC, Weiss AA. Cloning and sequencing of a *Bordetella pertussis* serum resistance locus. *Infect Immun*. 1994 Nov;62(11):4727–38.
46. Jeukens J, Freschi L, Vincent AT, Emond-Rheault J-G, Kukavica-Ibrulj I, Charette SJ, et al. A Pan-Genomic Approach to Understand the Basis of Host Adaptation in *Achromobacter*. *Genome Biol Evol*. 2017 Apr 1;9(4):1030–46.
47. Marvig RL, Sommer LM, Molin S, Johansen HK. Convergent evolution and adaptation of *Pseudomonas aeruginosa* within patients with cystic fibrosis. *Nat Genet*. 2015 Jan;47(1):57–64.
48. Guénard S, Muller C, Monlezun L, Benas P, Broutin I, Jeannot K, et al. Multiple mutations lead to MexXY-OprM-dependent aminoglycoside resistance in clinical strains of *Pseudomonas aeruginosa*. *Antimicrob Agents Chemother*. 2014;58(1):221–8.
49. Frimodt-Møller J, Rossi E, Haagensen JAJ, Falcone M, Molin S, Johansen HK. Mutations causing low level antibiotic resistance ensure bacterial survival in antibiotic-treated hosts. *Sci Rep*. 2018 Aug 21;8(1):12512.
50. Marvig RL, Sommer LM, Jelsbak L, Molin S, Johansen HK. Evolutionary insight from whole-genome sequencing of *Pseudomonas aeruginosa* from cystic fibrosis patients. *Future Microbiol*. 2015;10(4):599–611.
51. Gabrielaite M, Johansen HK, Molin S, Nielsen FC, Marvig RL. Gene loss and acquisition in lineages of bacteria evolving in a human host environment. *BioRxiv*. 2020 Feb 3;
52. Marvig RL, Damkiær S, Khademi SM, Markussen TM, Molin S, Jelsbak L. Within-host evolution of *Pseudomonas aeruginosa* reveals adaptation toward iron acquisition from hemoglobin. *MBio*. 2014 May 6;5(3):e00966-14.
53. Tyrrell J, Whelan N, Wright C, Sá-Correia I, McClean S, Thomas M, et al. Investigation of the multifaceted iron acquisition strategies of *Burkholderia cenocepacia*. *Biometals*. 2015 Apr;28(2):367–80.
54. Conn GL, Bavro VN, Davies C. Editorial: bacterial mechanisms of antibiotic resistance: A structural perspective. *Front Mol Biosci*. 2019 Aug 14;6:71.
55. Galperin MY, Kristensen DM, Makarova KS, Wolf YI, Koonin EV. Microbial genome analysis: the COG approach. *Brief Bioinformatics*. 2019 Jul 19;20(4):1063–70.
56. Hu Y, Zhu Y, Ma Y, Liu F, Lu N, Yang X, et al. Genomic insights into intrinsic and acquired drug resistance mechanisms in *Achromobacter xylosoxidans*. *Antimicrob Agents Chemother*. 2015 Feb;59(2):1152–61.

57. Sommer LM, Johansen HK, Molin S. Antibiotic resistance in *Pseudomonas aeruginosa* and adaptation to complex dynamic environments. *Microb Genom.* 2020 Apr 29;
58. Vranakis I, Goniou I, Psaroulaki A, Sandalakis V, Tselentis Y, Gevaert K, et al. Proteome studies of bacterial antibiotic resistance mechanisms. *J Proteomics.* 2014 Jan 31;97:88–99.
59. Harms A, Maisonneuve E, Gerdes K. Mechanisms of bacterial persistence during stress and antibiotic exposure. *Science.* 2016 Dec 16;354(6318).
60. Lieberman TD, Flett KB, Yelin I, Martin TR, McAdam AJ, Priebe GP, et al. Genetic variation of a bacterial pathogen within individuals with cystic fibrosis provides a record of selective pressures. *Nat Genet.* 2014 Jan;46(1):82–7.
61. Lieberman TD, Wilson D, Misra R, Xiong LL, Moodley P, Cohen T, et al. Genomic diversity in autopsy samples reveals within-host dissemination of HIV-associated *Mycobacterium tuberculosis*. *Nat Med.* 2016 Oct 31;22(12):1470–4.
62. Microreact - Phylogenetic tree of clinical *Achromobacter* isolates and *Achromobacter* genomes available on RefSeq database [Internet]. [cited 2020 Jun 23]. Available from: <https://microreact.org/project/XBjPPEXWl>



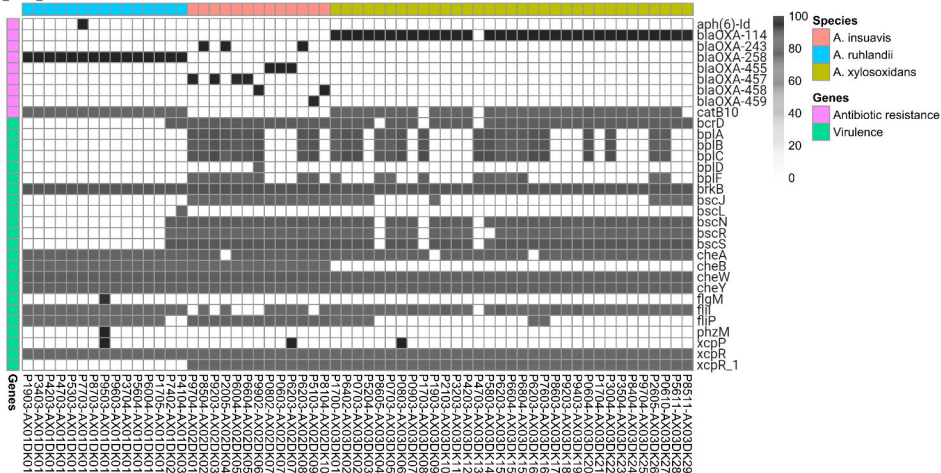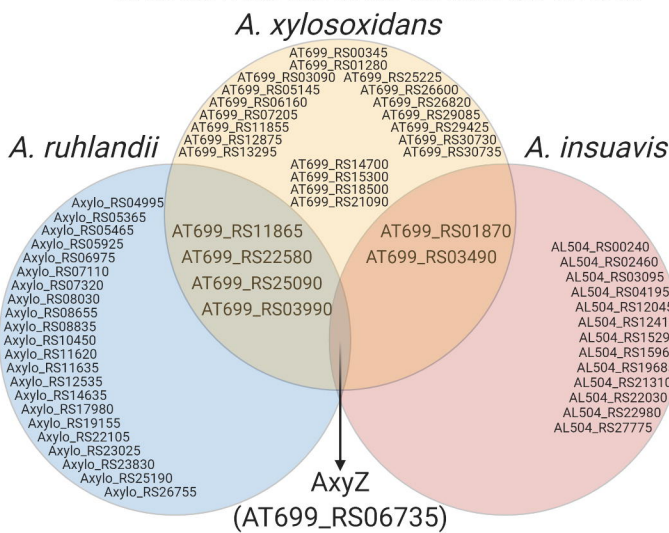

Pathoadaptive  
gene

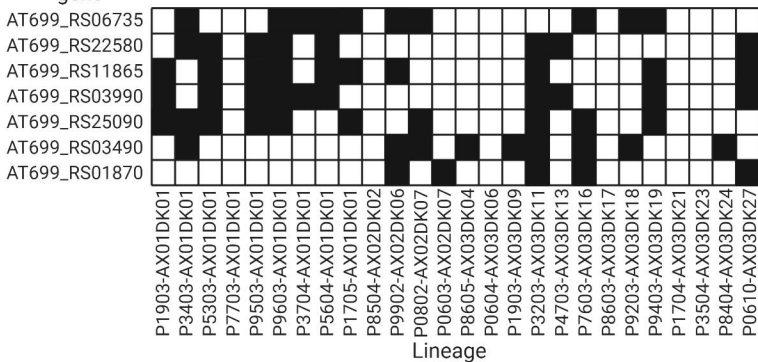

A

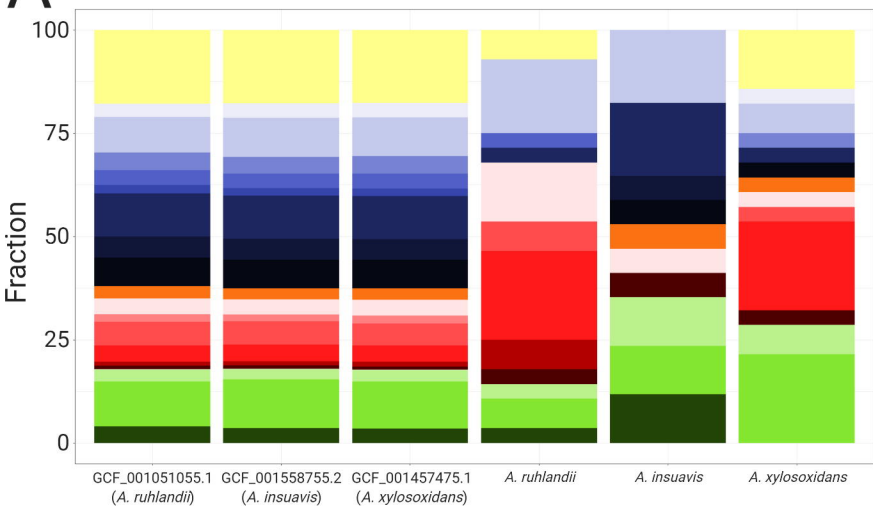

## COG function

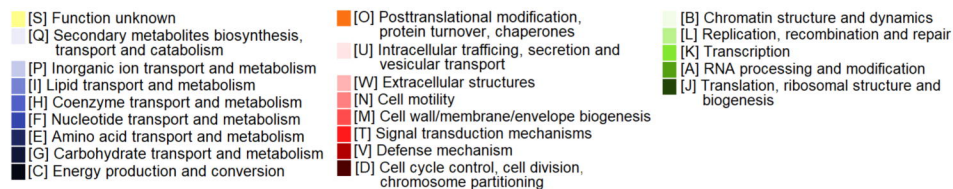

B

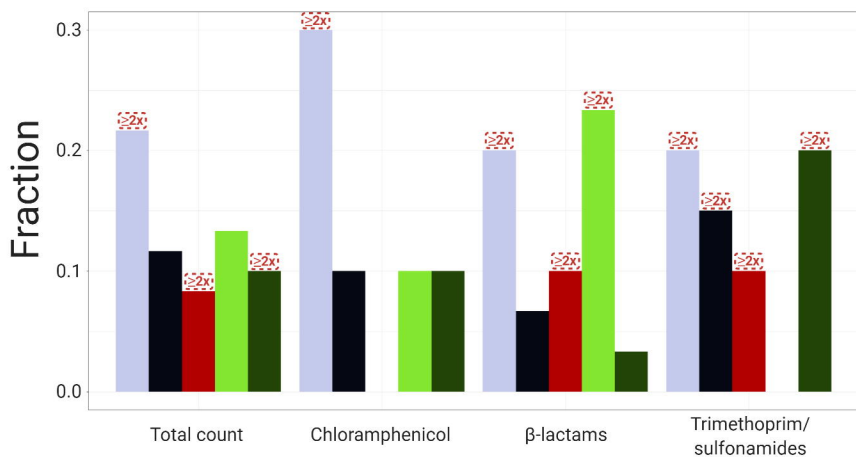

## COG function



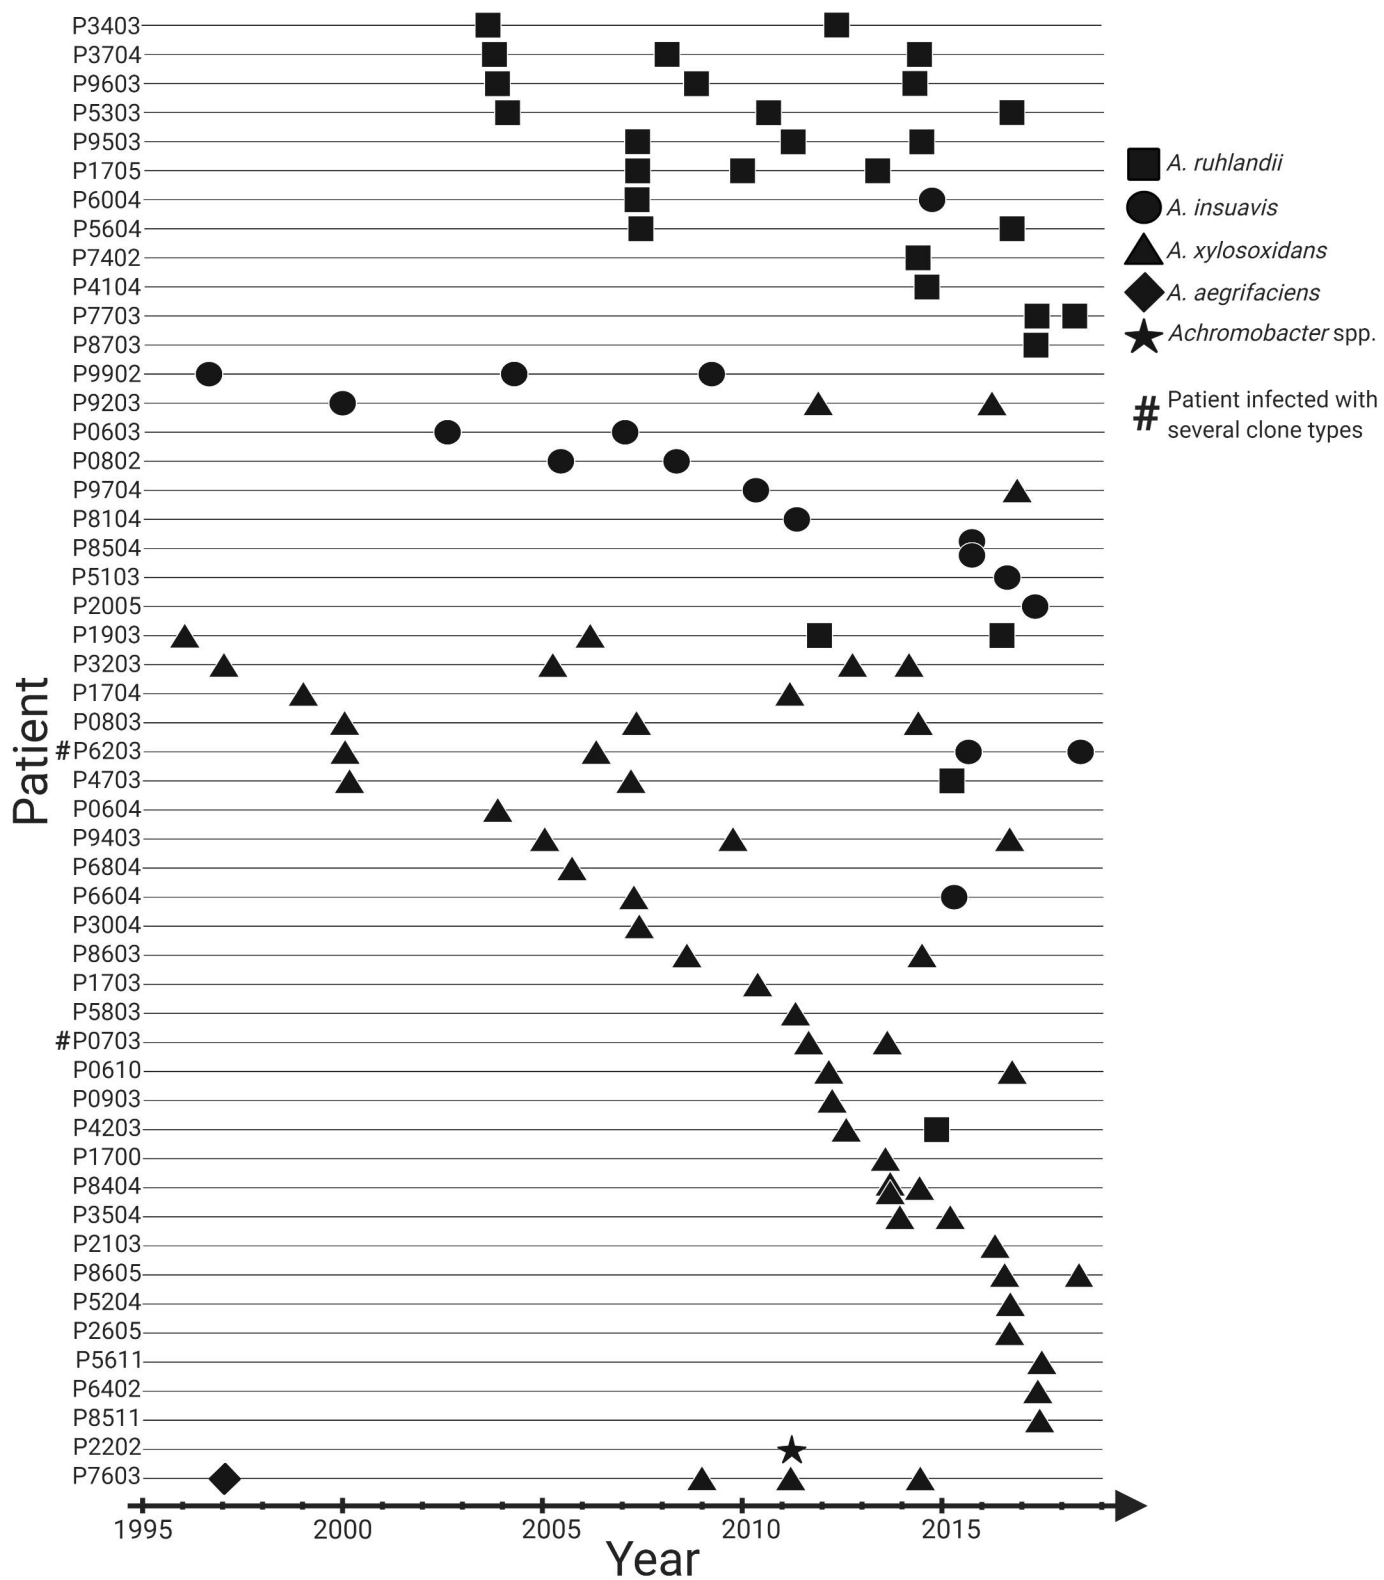

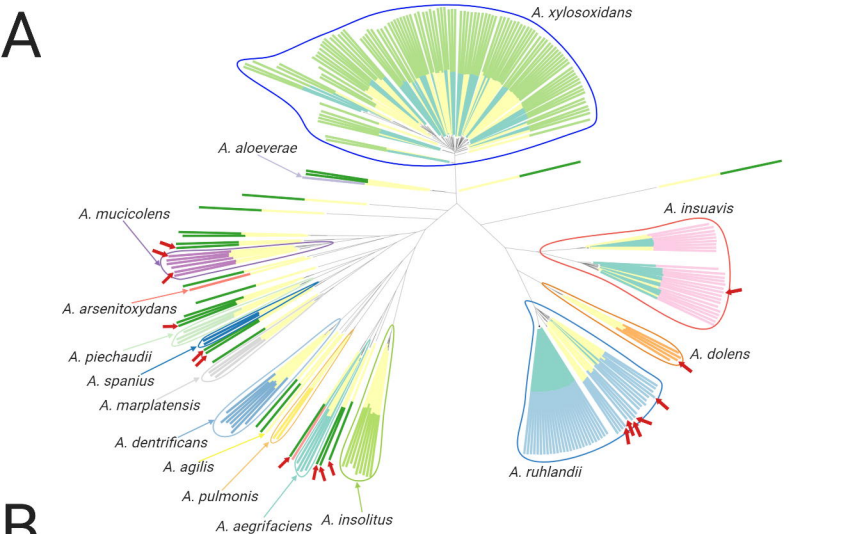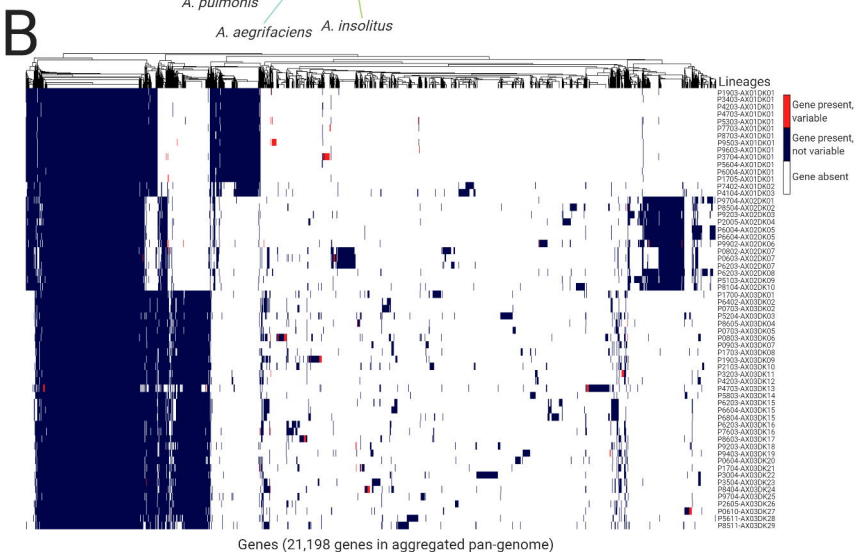

Source: https://www.biorxiv.org/content/10.1101/2021.01.13.426490v1.full.pdf
