# Supplementary material for: Achromobacter genetic adaptation in cystic fibrosis
Source: bioRxiv or medRxiv preprint supplement (doi:10.1101/2021.01.13.426490), 2021-01-13
Supplement: Supplementary file [file media-7.pdf]

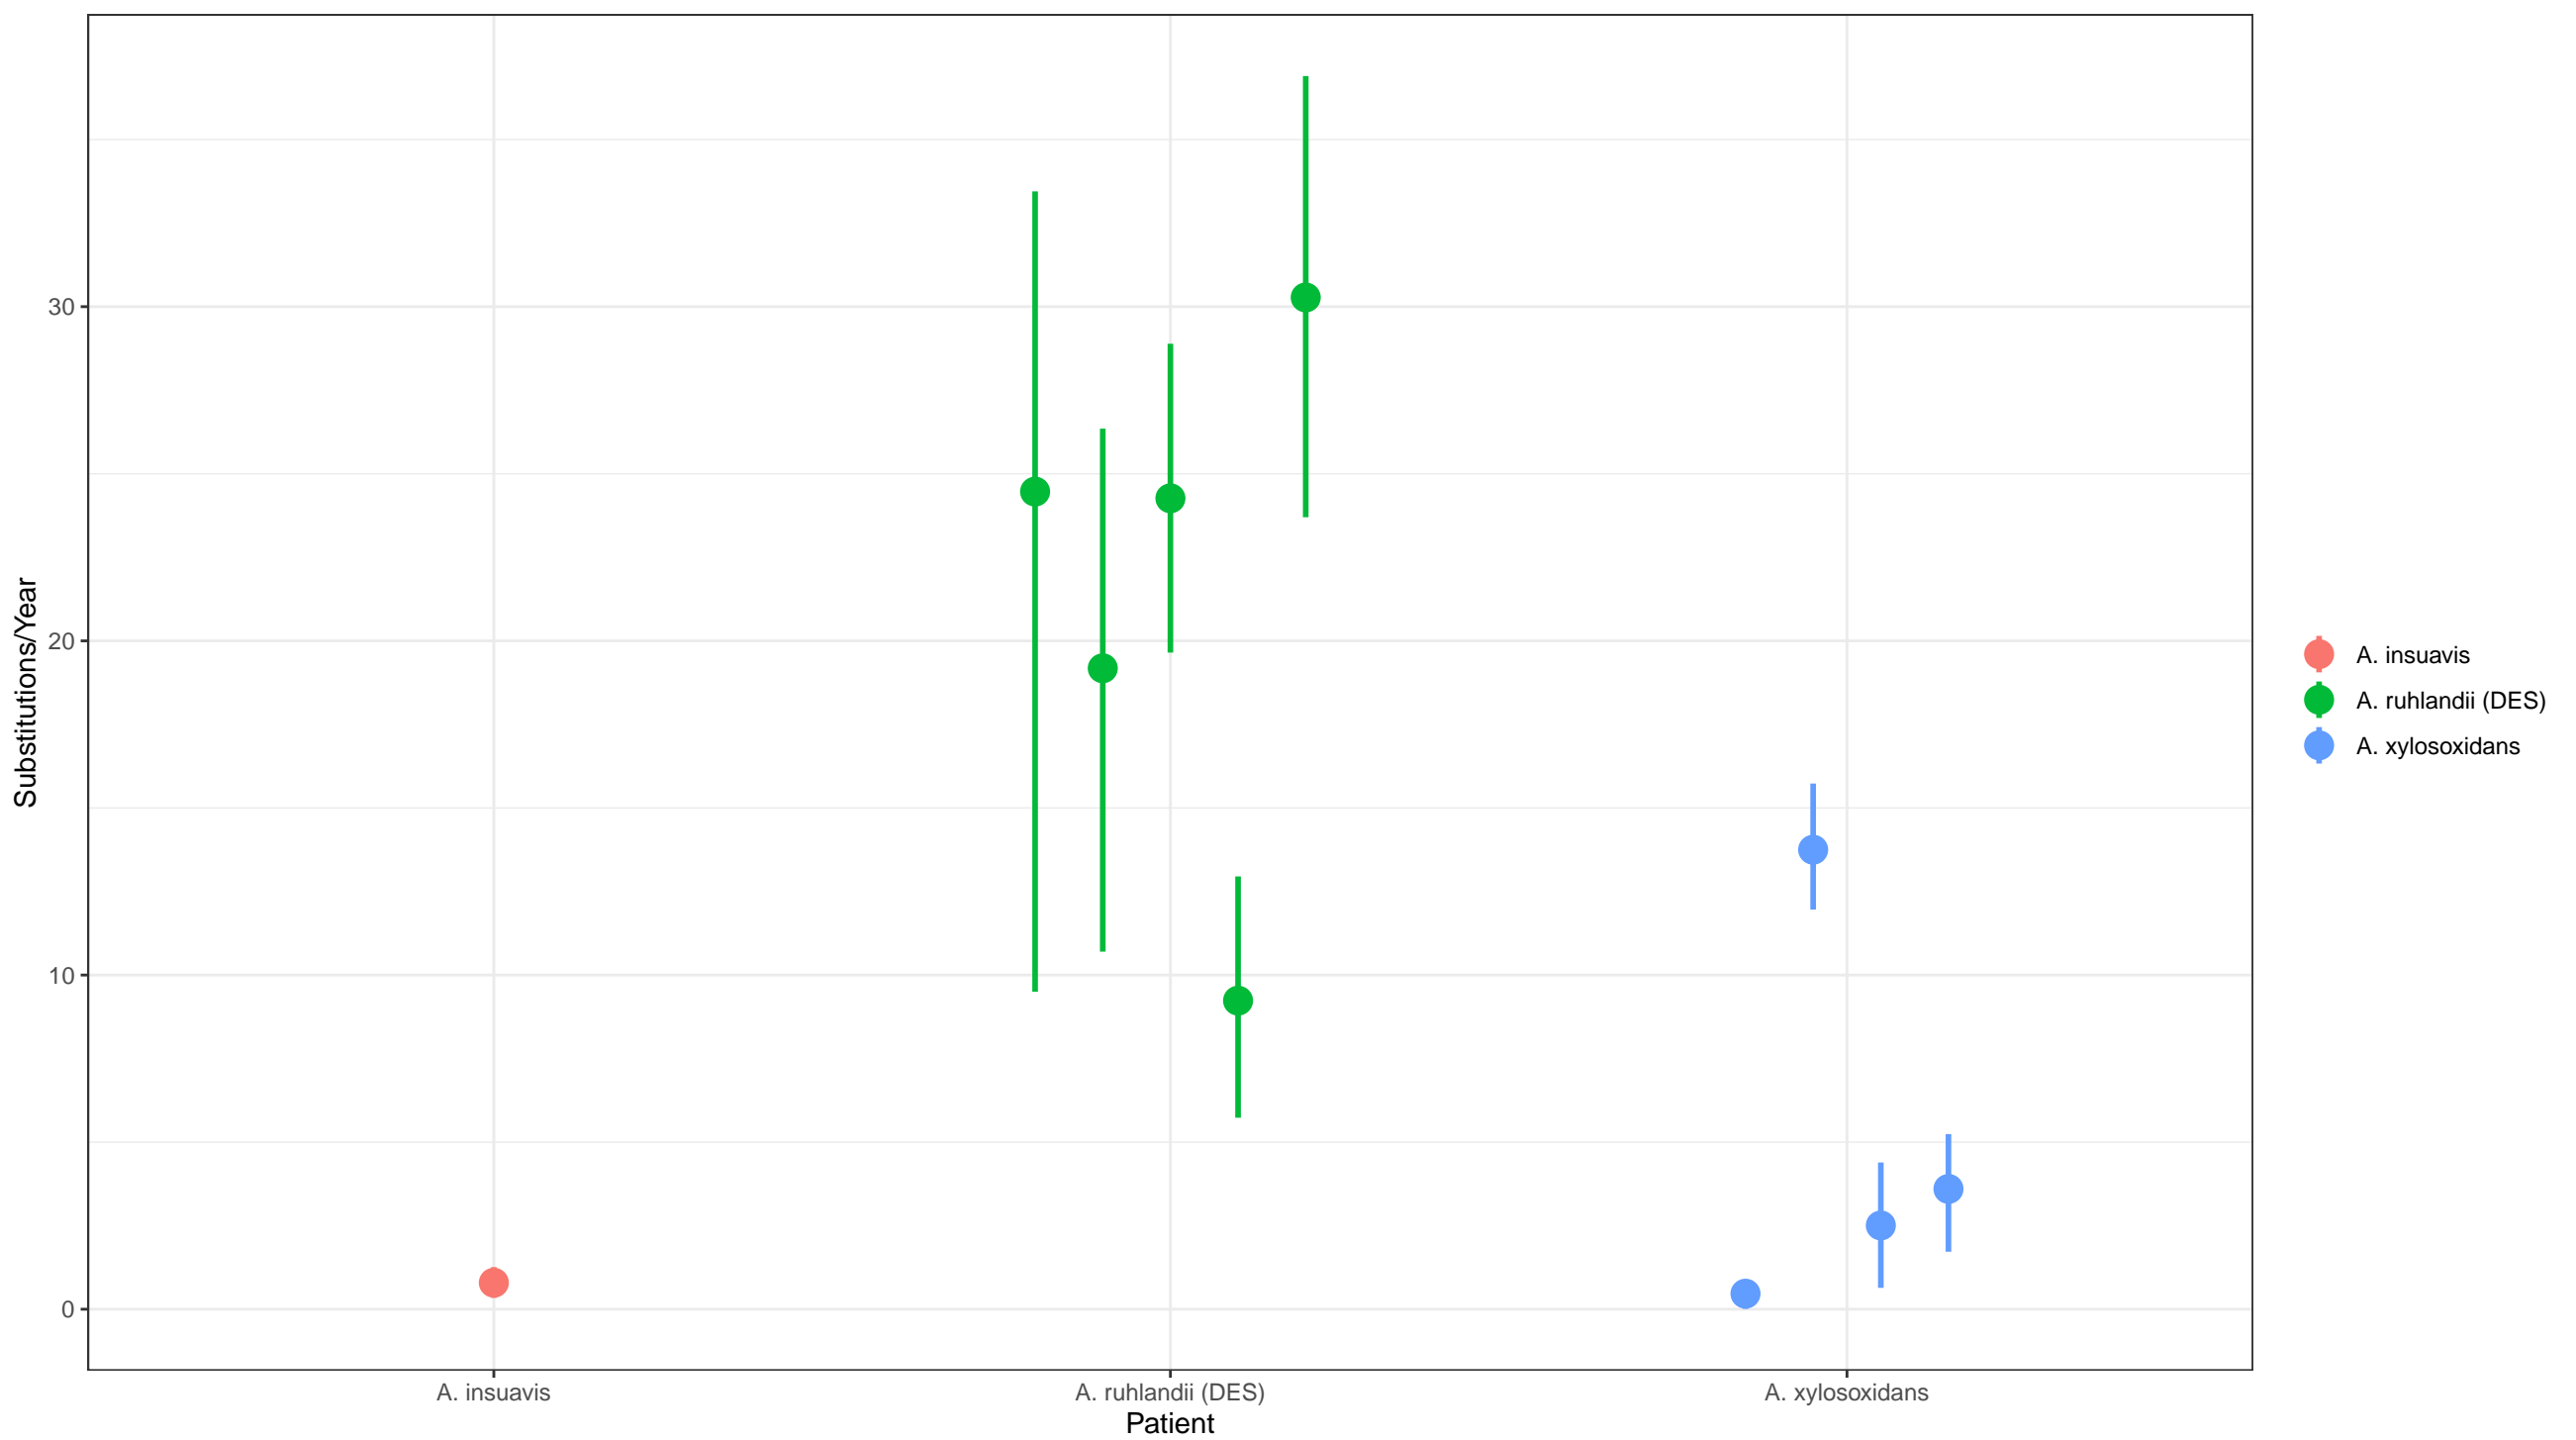

The tree height for the *A. insuavis* model is large, thus the estimated substitution rate might be too low
