# Supplementary material for: Achromobacter genetic adaptation in cystic fibrosis
Source: bioRxiv or medRxiv preprint supplement (doi:10.1101/2021.01.13.426490), 2021-01-13
Supplement: Supplementary file [file media-8.pdf]

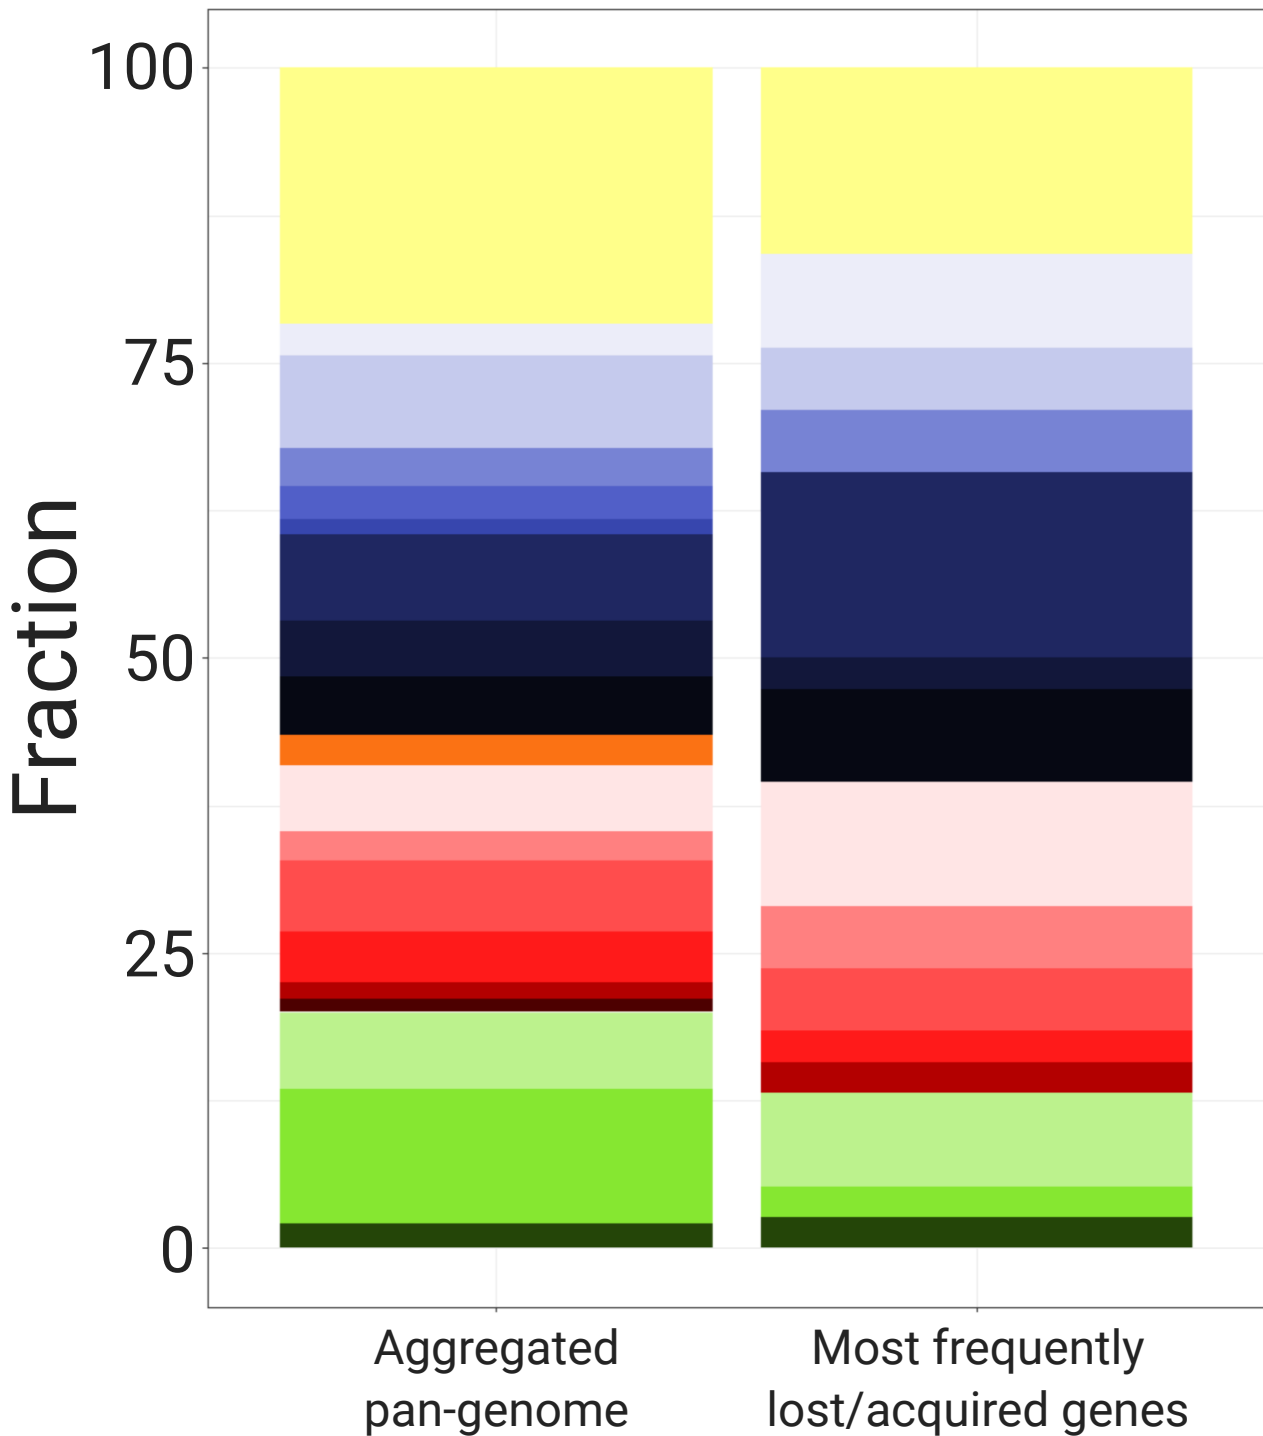

### COG function

- [S] Function unknown
- [Q] Secondary metabolites biosynthesis, transport and catabolism
- [P] Inorganic ion transport and metabolism
- [I] Lipid transport and metabolism
- [H] Coenzyme transport and metabolism
- [F] Nucleotide transport and metabolism
- [E] Amino acid transport and metabolism
- [G] Carbohydrate transport and metabolism
- [C] Energy production and conversion
- [O] Posttranslational modification, protein turnover, chaperones
- [U] Intracellular trafficking, secretion and vesicular transport
- [W] Extracellular structures
- [N] Cell motility
- [M] Cell wall/membrane/envelope biogenesis
- [T] Signal transduction mechanisms
- [V] Defense mechanism
- [D] Cell cycle control, cell division, chromosome partitioning
- [B] Chromatin structure and dynamics
- [L] Replication, recombination and repair
- [K] Transcription
- [A] RNA processing and modification
- [J] Translation, ribosomal structure and biogenesis
